# Supplementary material for: Quantification of the type 2 diabetes risk in women with gestational diabetes: a systematic review and meta-analysis of 95,750 women
Source: PubMed Central journal article supplement (PMC4901120; doi:10.1007/s00125-016-3927-2), 2016-04-13
Supplement: 125_2016_3927_MOESM1_ESM.pdf [file 125_2016_3927_MOESM1_ESM.pdf]

**ESM Figure 1 Summary estimates of association of maternal risk factors (continuous variables) and progression to type 2 diabetes in women with gestational diabetes**

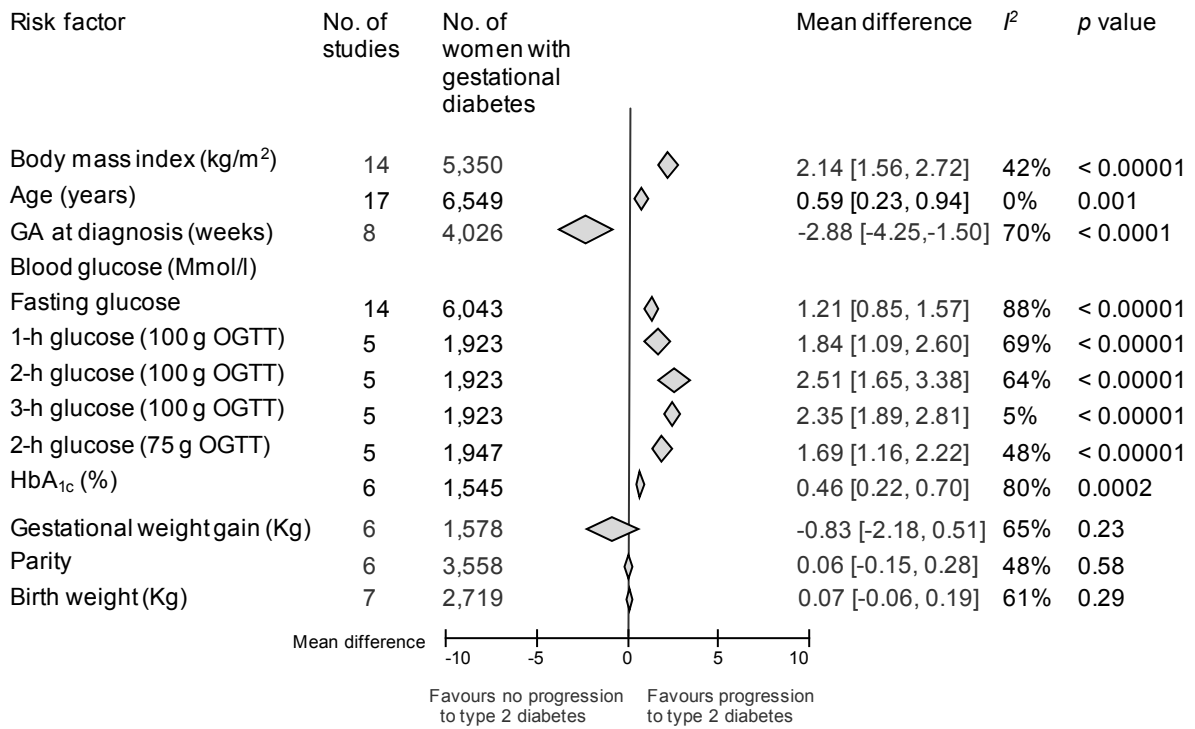

GA gestational age
