# Supplementary material for: Quantification of the type 2 diabetes risk in women with gestational diabetes: a systematic review and meta-analysis of 95,750 women
Source: PubMed Central journal article supplement (PMC4901120; doi:10.1007/s00125-016-3927-2), 2016-04-13
Supplement: 125_2016_3927_MOESM3_ESM.pdf [file 125_2016_3927_MOESM3_ESM.pdf]

**ESM Table 2 Newcastle-Ottawa Scale rating of quality of included studies in the systematic review on quantification of the type 2 diabetes risk in women with gestational diabetes**

| Study id/year       | Selection                                |                                     |                           |                                  | Comparability |              |                                                         |       | Outcome      |                       |                                   |                       |       |              |
|---------------------|------------------------------------------|-------------------------------------|---------------------------|----------------------------------|---------------|--------------|---------------------------------------------------------|-------|--------------|-----------------------|-----------------------------------|-----------------------|-------|--------------|
|                     | Representativeness of the exposed cohort | Selection of the non-exposed cohort | Ascertainment of exposure | Outcome not present at the start | Total         | Risk of bias | Comparability of cohorts on basis of design or analysis | Total | Risk of bias | Assessment of outcome | Follow-up long enough for outcome | Adequacy of follow-up | Total | Risk of bias |
| Kwak 2013           | *                                        | *                                   | *                         | *                                | 4             | Low          | *                                                       | 1     | Medium       | *                     | *                                 |                       | 2     | Medium       |
| Wang 2012           |                                          | *                                   | *                         | *                                | 3             | Medium       | **                                                      | 2     | Low          | *                     | *                                 |                       | 2     | Medium       |
| Tura 2012           |                                          | *                                   | *                         |                                  | 2             | Medium       | *                                                       | 1     | Medium       | *                     | *                                 | *                     | 3     | Low          |
| Gunderson 2012      | *                                        | *                                   | *                         |                                  | 3             | Medium       | **                                                      | 2     | Low          | *                     |                                   | *                     | 2     | Medium       |
| Chew 2012           |                                          | *                                   | *                         |                                  | 2             | Medium       | *                                                       | 1     | Medium       | *                     | *                                 |                       | 2     | Medium       |
| Xiang 2011          |                                          | *                                   | *                         | *                                | 3             | Medium       | *                                                       | 1     | Medium       | *                     | *                                 |                       | 2     | Medium       |
| Kim 2011            |                                          | *                                   | *                         | *                                | 3             | Medium       | *                                                       | 1     | Medium       | *                     |                                   | *                     | 2     | Medium       |
| Gobl 2011           |                                          | *                                   | *                         | *                                | 3             | Medium       | *                                                       | 1     | Medium       | *                     | *                                 | *                     | 3     | Low          |
| Ekelund 2010        | *                                        | *                                   | *                         |                                  | 3             | Medium       | *                                                       | 1     | Medium       | *                     | *                                 | *                     | 3     | Low          |
| Feig 2013           |                                          | *                                   |                           | *                                | 2             | Medium       | **                                                      | 2     | Low          | *                     | *                                 |                       | 2     | Medium       |
| Ogonowski 2009      | *                                        | *                                   | *                         | *                                | 4             | Low          | *                                                       | 1     | Medium       | *                     |                                   |                       | 1     | High         |
| Hossein-Nezhad 2009 | *                                        | *                                   | *                         |                                  | 3             | Medium       | *                                                       | 1     | Medium       | *                     |                                   | *                     | 2     | Medium       |
| Russell 2008        |                                          | *                                   | *                         | *                                | 3             | Medium       | **                                                      | 2     | Low          | *                     | *                                 |                       | 2     | Medium       |
| Rivero 2008         |                                          | *                                   | *                         | *                                | 3             | Medium       | *                                                       | 1     | Medium       | *                     |                                   | *                     | 2     | Medium       |
| Krishnaveni 2007    |                                          | *                                   | *                         | *                                | 3             | Medium       | *                                                       | 1     | Medium       | *                     | *                                 |                       | 2     | Medium       |

|                    |   |   |   |   |   |        |    |   |        |   |   |   |        |        |
|--------------------|---|---|---|---|---|--------|----|---|--------|---|---|---|--------|--------|
| Oldfield 2007      |   | * | * | * | 3 | Medium | *  | 1 | Medium | * | * | 2 | Medium |        |
| Schaefer-Graf 2002 | * | * | * |   | 3 | Medium | ** | 2 | Low    | * |   | 1 | High   |        |
| Zonenberg 2006     | * | * | * |   | 3 | Medium | *  | 1 | Medium | * | * | * | 3      | Low    |
| Kousta 2006        | * | * | * |   | 3 | Medium | *  | 1 | Medium |   |   | * | 1      | High   |
| Jarvela 2006       |   | * | * | * | 3 | Medium | *  | 1 | Medium |   | * | * | 2      | Medium |
| Cho 2006           | * | * | * |   | 3 | Medium | ** | 2 | Low    | * | * | * | 3      | Low    |
| Cheung 2006        |   | * | * |   | 2 | Medium | *  | 1 | Medium | * | * | * | 3      | Low    |
| Pallardo 1999      |   | * | * |   | 2 | Medium | *  | 1 | Medium | * |   | * | 2      | Medium |
| Buchanan 1999      |   | * | * |   | 2 | Medium | *  | 1 | Medium | * |   | * | 2      | Medium |
| Dalfra 2001        | * | * | * |   | 3 | Medium | *  | 1 | Medium | * | * | * | 3      | Low    |
| Steinhart 1997     |   | * | * | * | 3 | Medium | *  | 1 | Medium | * | * |   | 2      | Medium |
| Damm 1992          |   | * | * |   | 2 | Medium | *  | 1 | Medium | * | * | * | 3      | Low    |
| Weijers 2006       | * | * | * | * | 4 | Low    | *  | 1 | Medium | * |   | * | 2      | Medium |
| Hunger-Dathe 2006  |   | * | * |   | 2 | Medium | *  | 1 | Medium | * | * |   | 2      | Medium |
| Mukerji 2012       | * | * |   | * | 3 | Medium | *  | 1 | Medium | * | * |   | 2      | Medium |
| Greenberg 1995     | * | * | * |   | 3 | Medium | *  | 1 | Medium | * |   |   | 1      | High   |
| Lin 2005           | * | * | * | * | 4 | Low    | *  | 1 | Medium | * |   |   | 1      | High   |
| Capula 2014        |   | * | * | * | 3 | Medium | *  | 1 | Medium | * |   | * | 2      | Medium |
| Bentley Lewis 2014 |   | * | * |   | 2 | Medium | *  | 1 | Medium | * | * | * | 3      | Low    |
| Liu 2014           |   | * |   |   | 1 | High   | ** | 2 | Low    | * |   |   | 1      | High   |
| Lin 2015           | * | * | * | * | 4 | Low    | *  | 1 | Medium | * | * |   | 2      | Medium |
| Bao 2015           |   | * | * | * | 3 | Medium | ** | 2 | Low    |   | * | * | 2      | Medium |

|                          |   |   |   |   |   |        |   |   |        |   |   |   |   |     |
|--------------------------|---|---|---|---|---|--------|---|---|--------|---|---|---|---|-----|
| Eades 2015               | * | * | * | * | 4 | Low    | * | 1 | Medium | * | * | * | 3 | Low |
| Carvalho Ribeiro<br>2015 | * | * | * |   | 3 | Medium | * | 1 | Medium | * | * | * | 3 | Low |
